# Supplementary material
Source: PubMed Central journal article supplement (PMC3567497)

**Fig 3**

**A**

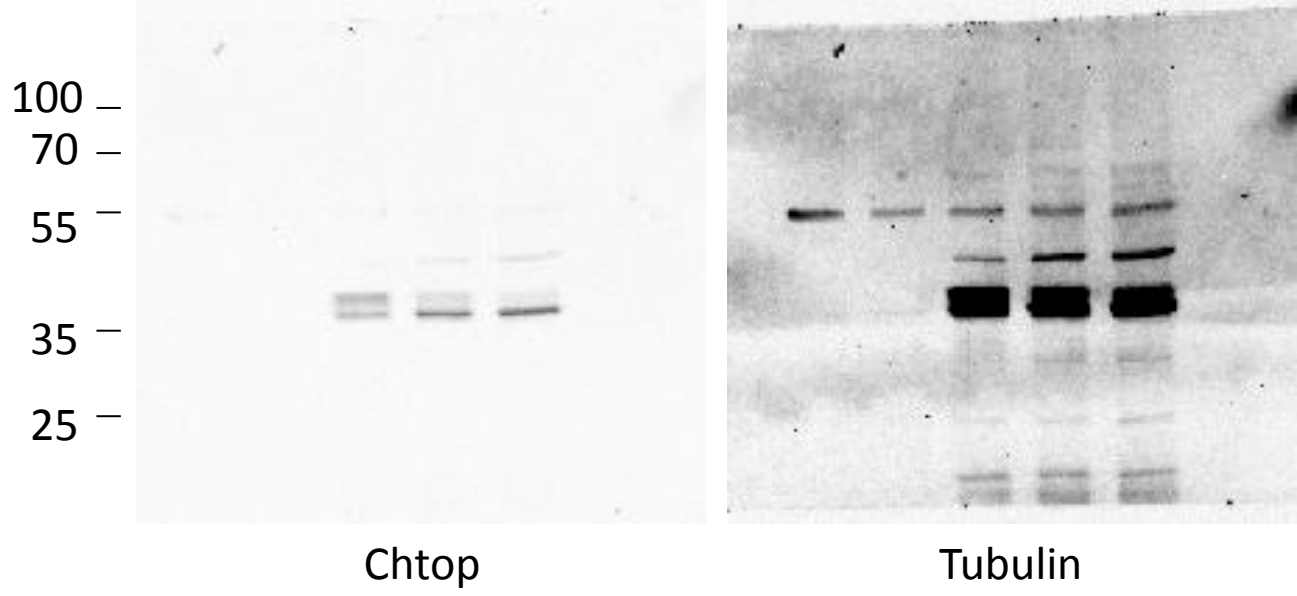

**B**

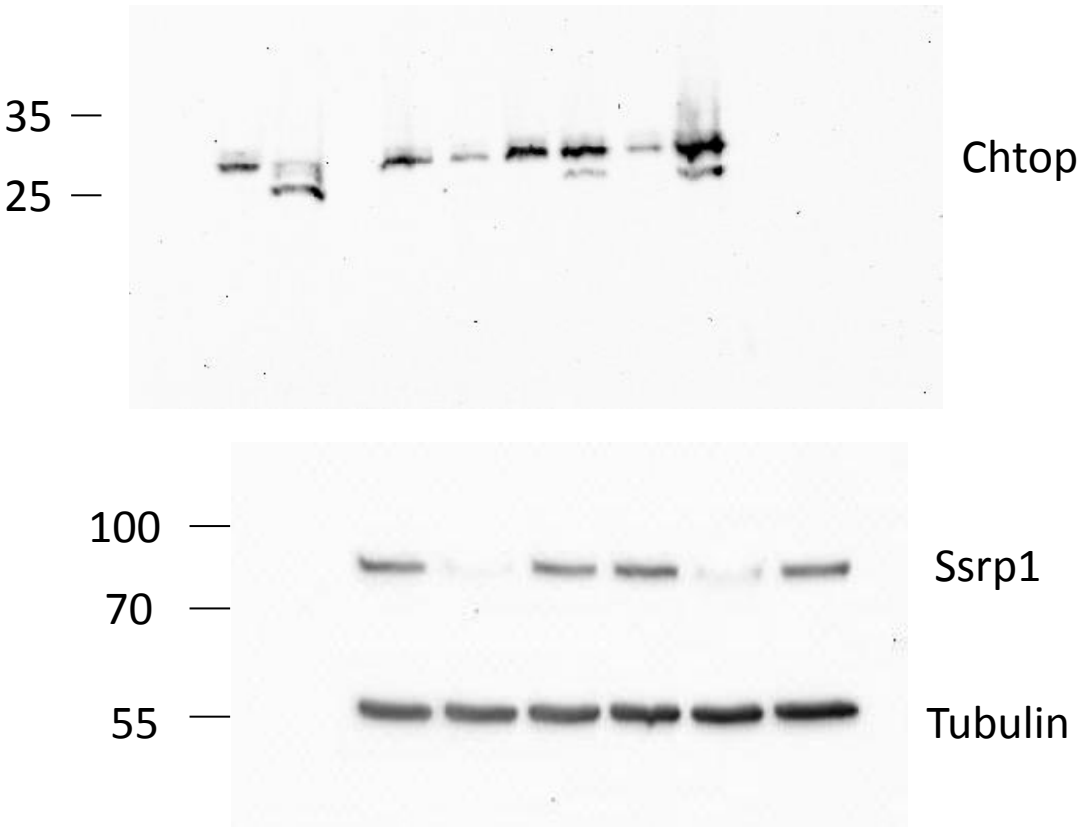

**C**

100 —  
70 —  
55 —  
35 —  
25 —

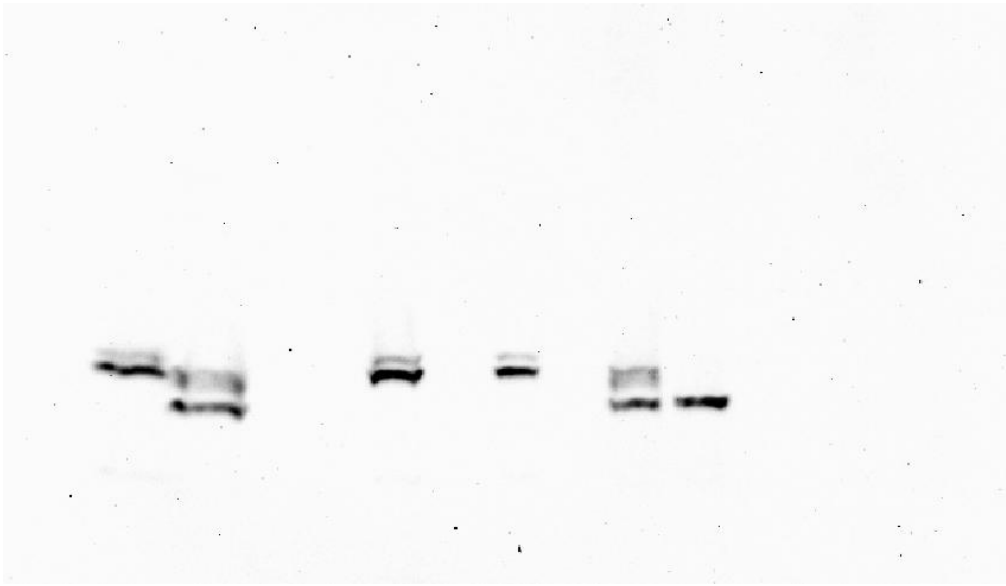

Chtop

**D**

35 —  
25 —

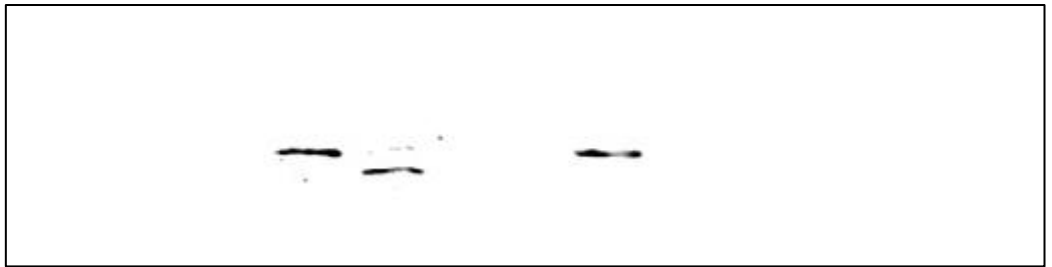

Chtop

100 —  
70 —  
55 —

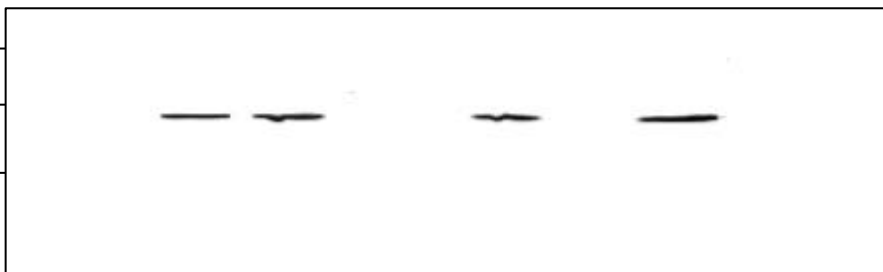

Nxf1

**E**

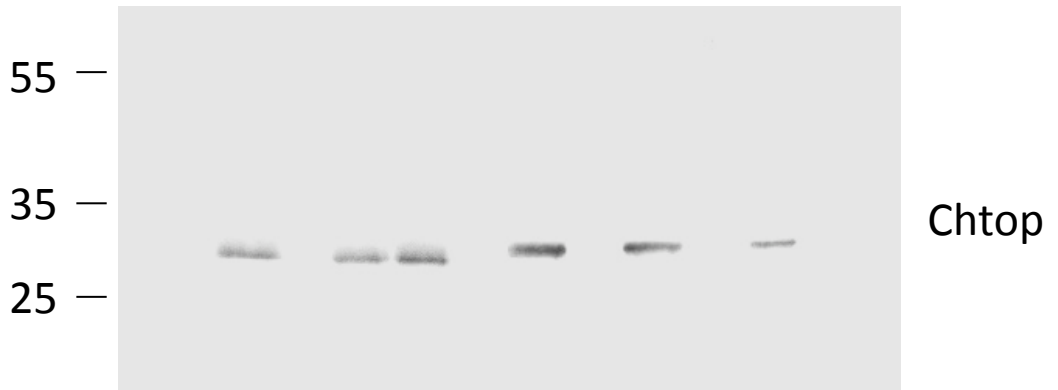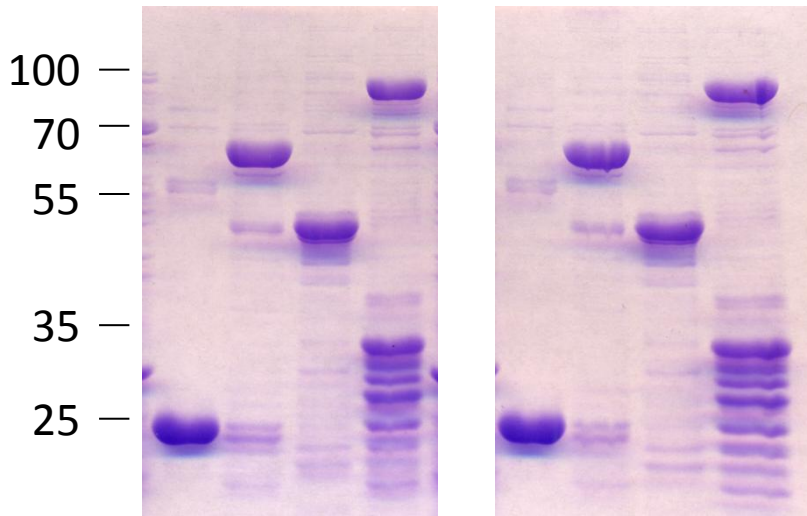

**F**

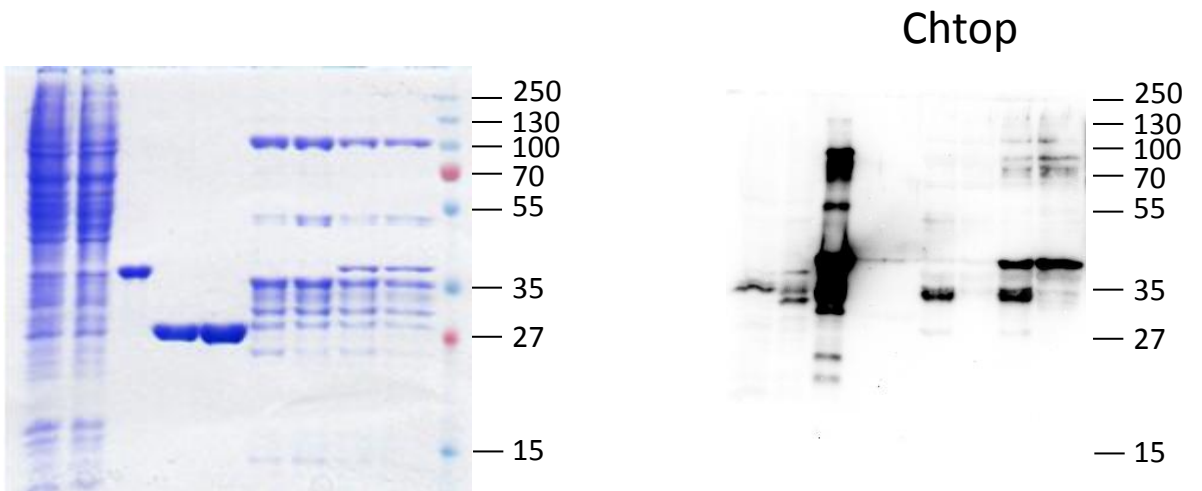

**G**

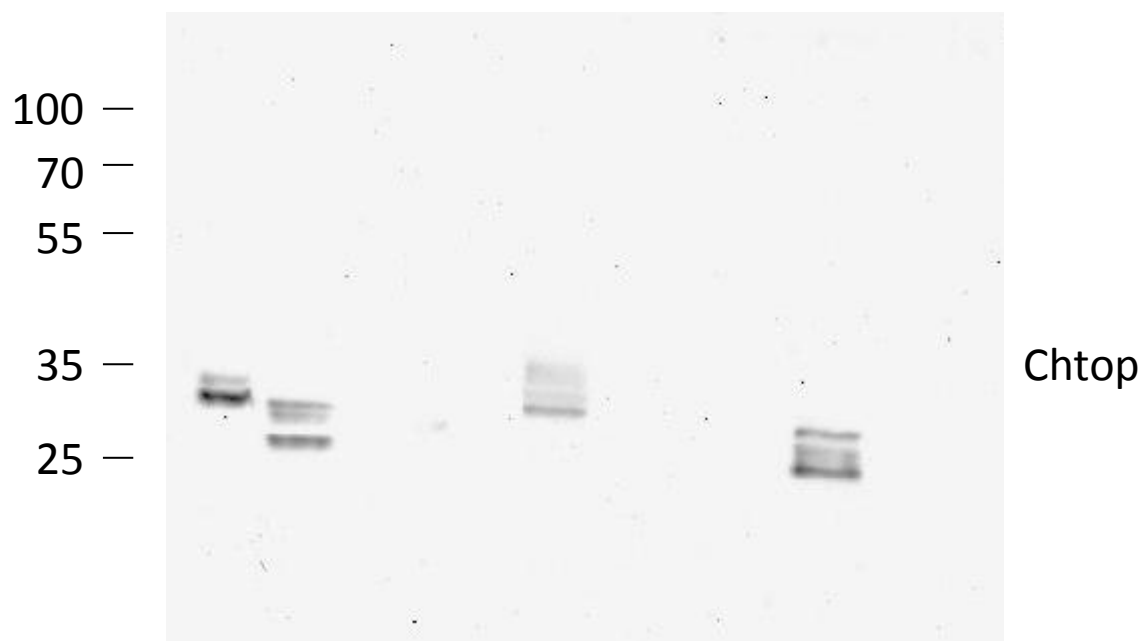

Supplement: emboj2012342df3.pdf [file emboj2012342df3.pdf]

**Fig. S1**

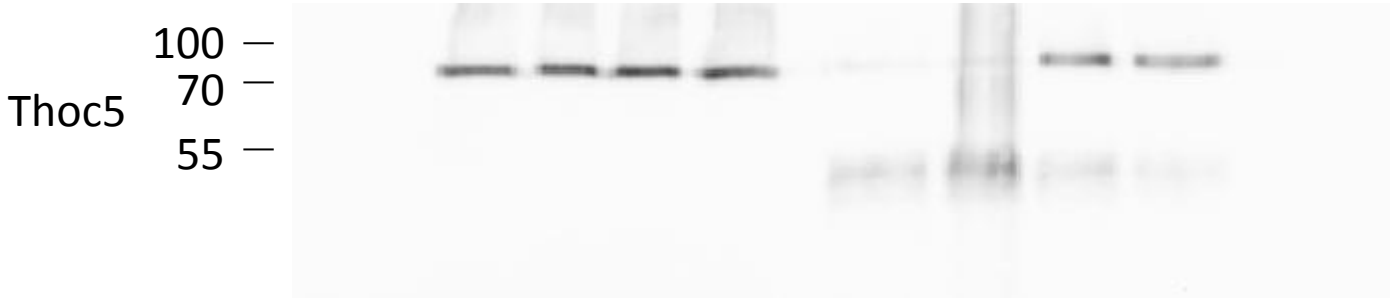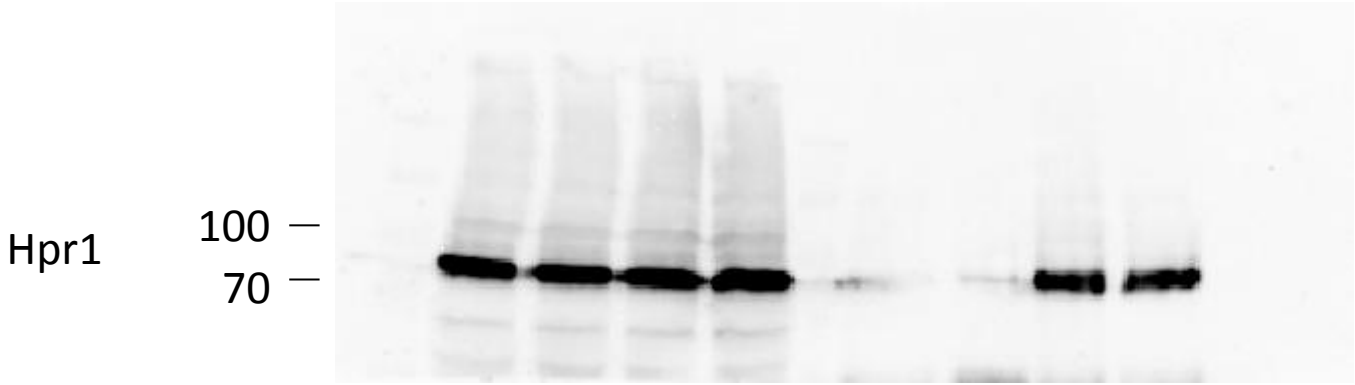

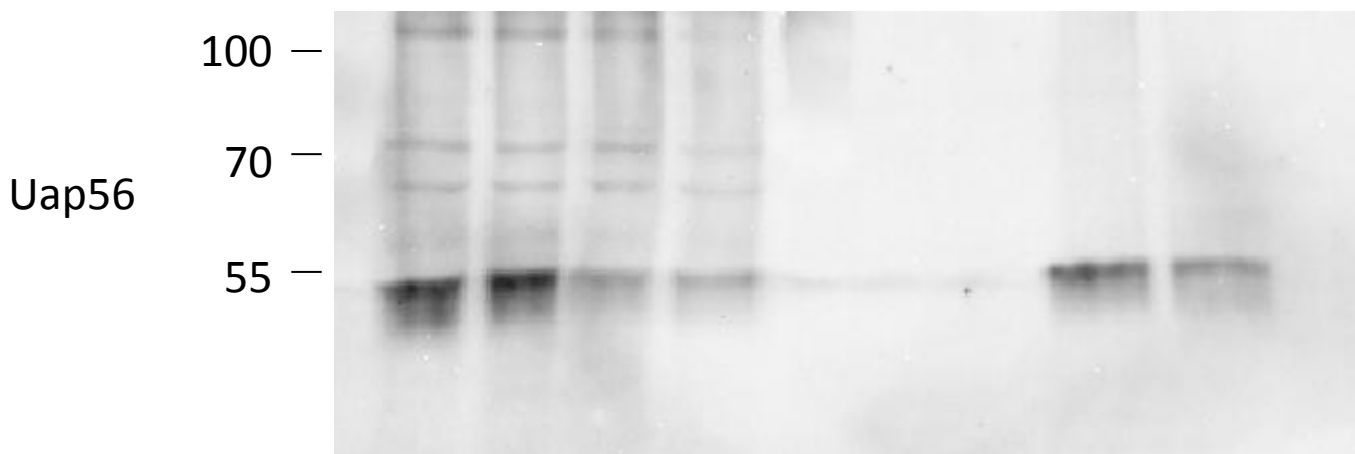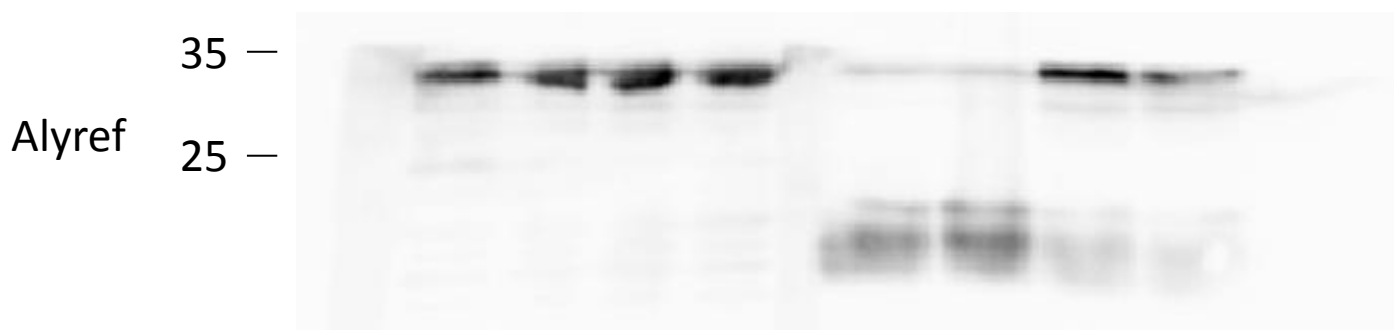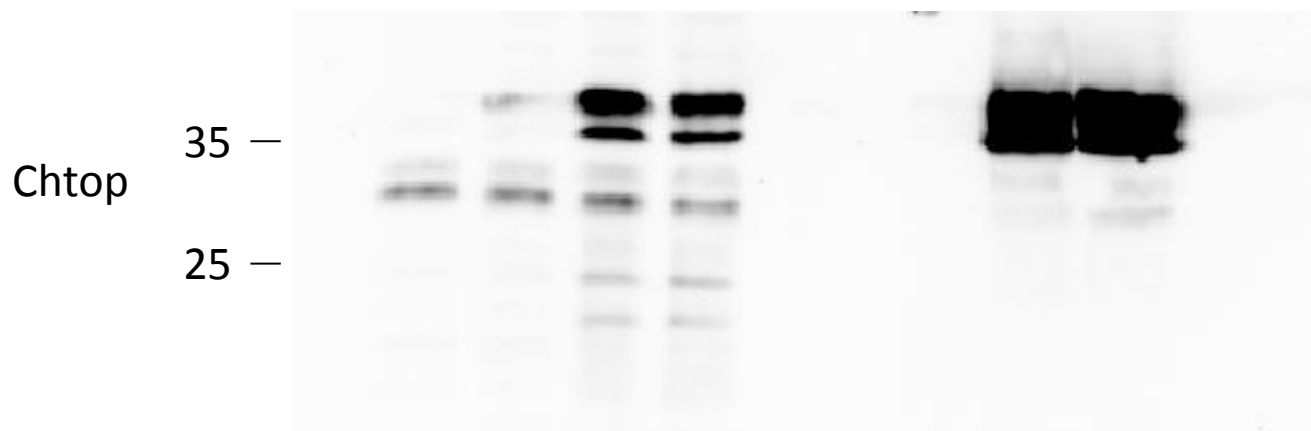

Supplement: emboj2012342dfs1.pdf [file emboj2012342dfs1.pdf]
